# Supplementary figures and images for: The Effects of Prenatal Diet on Calf Performance and Perspectives for Fetal Programming Studies: A Meta-Analytical Investigation
Source: MDPI journal article supplement (doi:10.3390/ani12162145), 2022-08-21

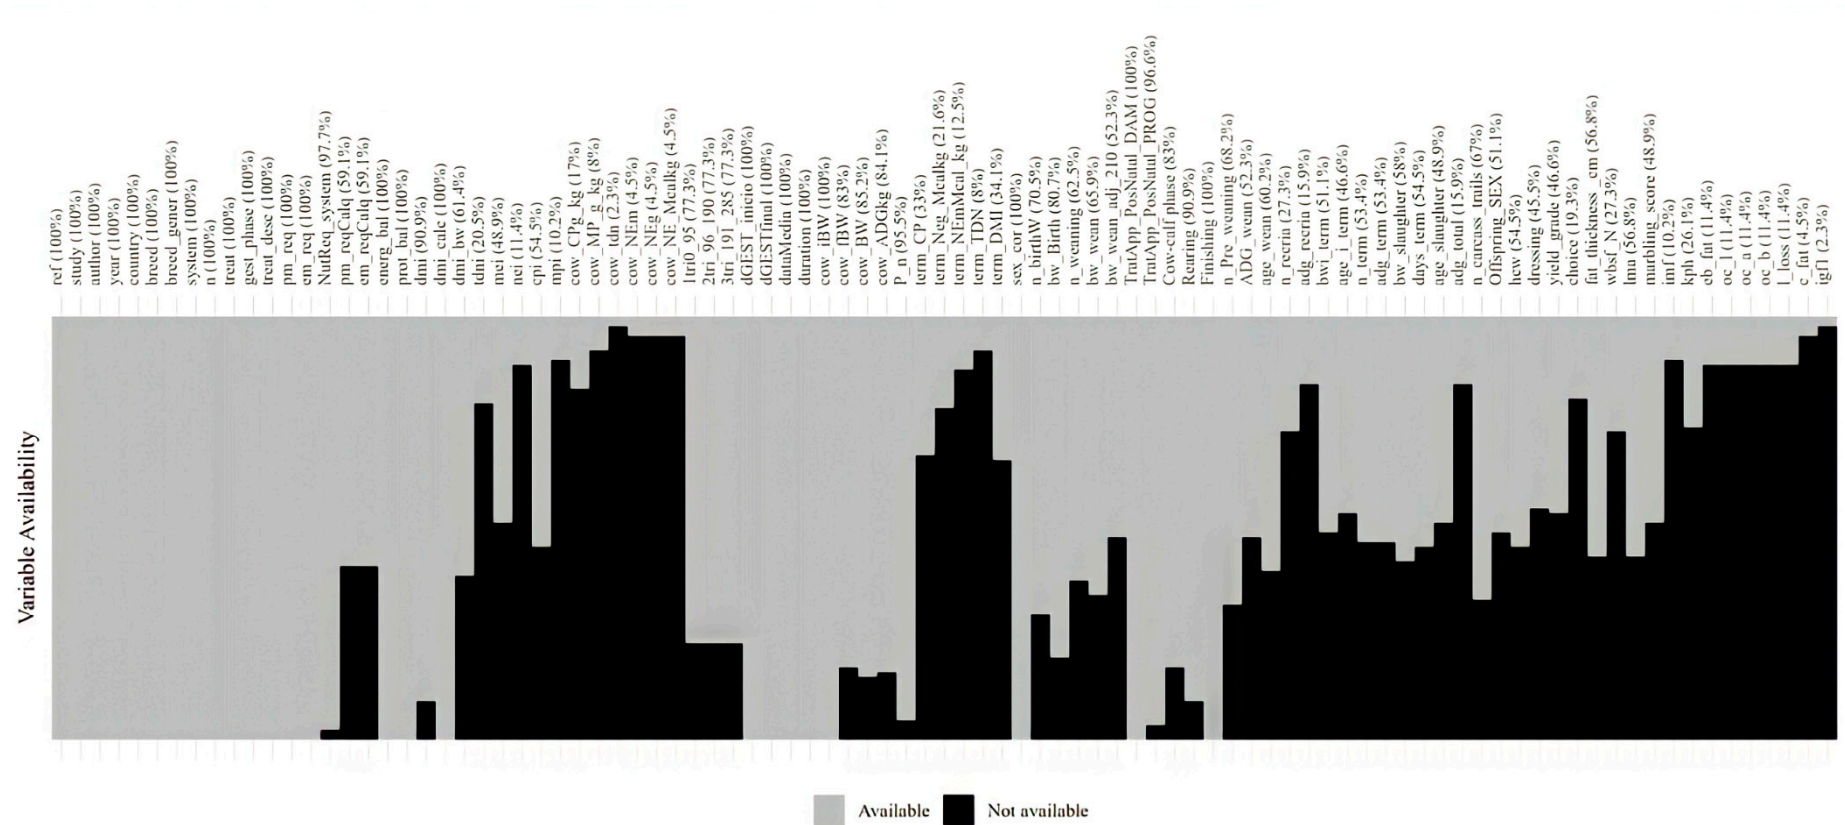

**Figure S1.** Interest outcomes over studies used in the exploratory step of meta-analysis.

Supplement: s1 [file s1]
